# Supplementary material
Source: PubMed Central journal article supplement (PMC5278606)

**A**

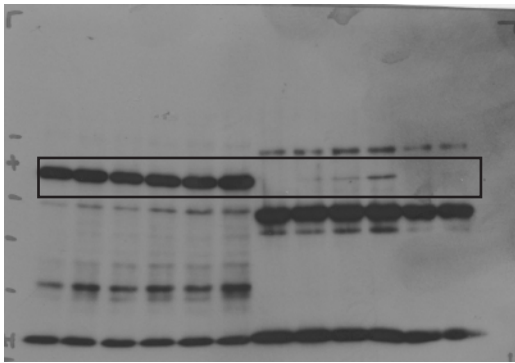

Blot:T7

**B**

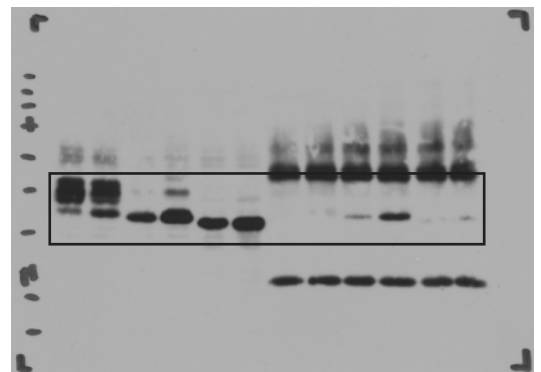

Blot:Flag

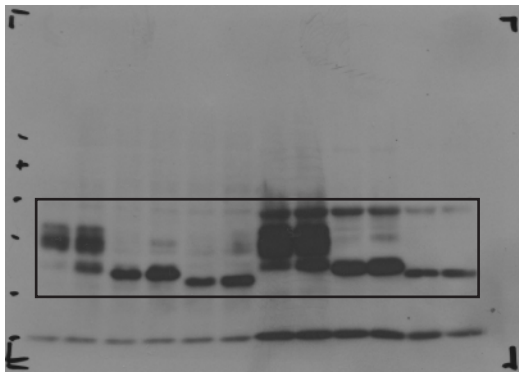

Blot:Flag

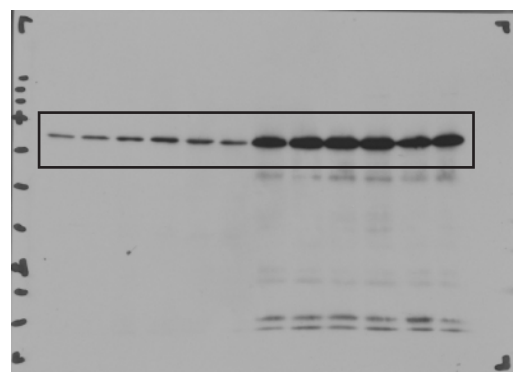

Blot:T7

**Figure 5, Suzuki *et al***  
**Original source data**

Supplement: EMBR-17-842-s006.pdf [file EMBR-17-842-s006.pdf]

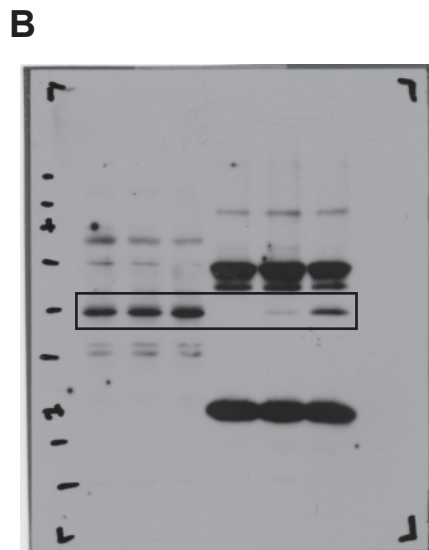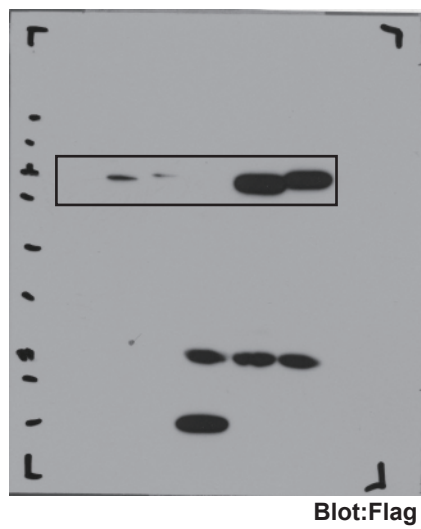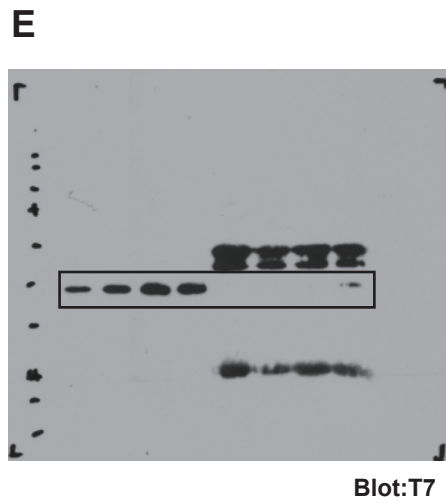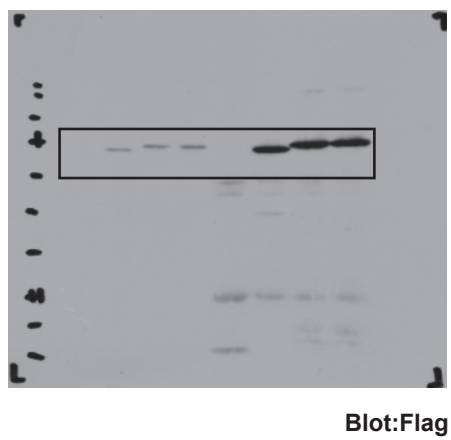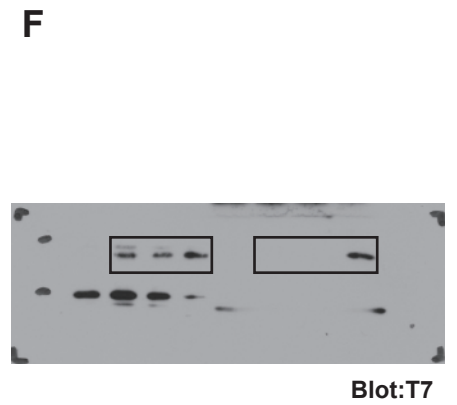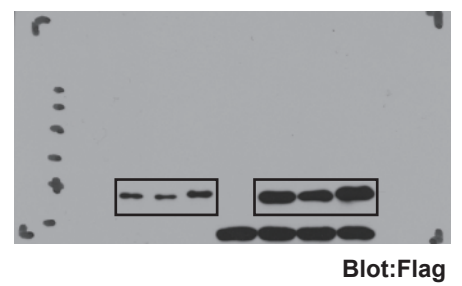

Figure 6, Suzuki *et al*  
Original source data

Supplement: EMBR-17-842-s007.pdf [file EMBR-17-842-s007.pdf]
